# Supplementary material
Source: publisher site journal article supplement (https://www.spandidos-publications.com/1682/downloadSupplementary)
Supplement: Supplementary file 1 [file downloadSupplementary]

## Sheet: Table S5
Table SV. List of known sRNAs differentially expressed in asymptomatic HTLV-1 infected subjects with monoclonal T cell expansion (ASM) vs healthy control subjects
Gene ID	p (Corr)	p	Regulation	FC (abs)	FC	Log FC	Accession	Entrez ID	Ensembl ID	Gene Type	DB Refs
MI0000483	3.62E-06	6.20E-07	down	4856258	-4856258	-2279845	hsa-mir-186	406962		miRNA	miRBase:MI0000483
chr1.trna35	0.006887754	0.004531417	up	30739703	30739703	16201032	trna35			tRNA
chr1.trna37	0.006887754	0.004531417	up	30739703	30739703	16201032	trna37			tRNA
chr1.trna39	0.006887754	0.004531417	up	30739703	30739703	16201032	trna39			tRNA
chr1.trna41	0.006887754	0.004531417	up	30739703	30739703	16201032	trna41			tRNA
chr1.trna68	1.66E-05	5.25E-06	down	14276532	-14276532	-38355737	trna68			tRNA
MI0000291	2.19E-05	8.36E-06	down	16920479	-16920479	-40806985	hsa-mir-215	406997	ENSG00000207590	miRNA	miRBase:MI0000291
MI0017308	4.93E-04	2.27E-04	down	24592097	-24592097	-12981948	hsa-mir-4677	100616343		miRNA	miRBase:MI0017308
ENSG00000241885	0.023821458	0.017552653	up	23356655	23356655	12238337	TRNAE40P		ENSG00000241885	tRNA_pseudogene	RFAM:RF00005
chr2.trna17	0.023821458	0.017552653	up	23356655	23356655	12238337	trna17			tRNA
ENSG00000222345	2.11E-06	3.33E-07	up	6936556	6936556	27942195	SNORD19		ENSG00000222345	snoRNA	RFAM:RF00569
MI0003583	9.70E-04	5.23E-04	down	4028607	-4028607	-2010281	hsa-mir-576	693161		miRNA	miRBase:MI0003583
ENSG00000239286	0.005094701	0.003083635	down	28806536	-28806536	-15263962	AC109927.1		ENSG00000239286	scRNA_pseudogene
MI0000786	6.22E-04	3.03E-04	up	25454006	25454006	13478928	hsa-mir-378a	494327		miRNA	miRBase:MI0000786
chr6.trna62	1.85E-05	6.57E-06	down	6863119	-6863119	-27788644	trna62			tRNA
ENSG00000221500	1.60E-07	1.68E-08	up	4484999	4484999	54870358	SNORD100	594838	ENSG00000221500	snoRNA	RFAM:RF00609
MI0003600	7.29E-09	1.92E-10	down	35900528	-35900528	-5165933	hsa-mir-550a-1	693133		miRNA	miRBase:MI0003600
MI0003601	7.29E-09	1.92E-10	down	35900528	-35900528	-5165933	hsa-mir-550a-2	693134	ENSG00000207573	miRNA	miRBase:MI0003601
MI0003602	0.009245167	0.006203993	down	3063557	-3063557	-16152077	hsa-mir-590	693175		miRNA	miRBase:MI0003602
MI0000272	1.33E-05	3.85E-06	down	19685276	-19685276	-4299045	hsa-mir-182	406958	ENSG00000207990	miRNA	miRBase:MI0000272
MI0002470	1.18E-06	1.71E-07	down	15701469	-15701469	-39728277	hsa-mir-486	619554		miRNA	miRBase:MI0002470
MI0000439	2.03E-08	1.05E-09	up	9108273	9108273	65091057	hsa-mir-23b	407011		miRNA	miRBase:MI0000439
MI0016747	8.94E-04	4.71E-04	down	56747737	-56747737	-25045629	hsa-mir-1254-2	100616217	ENSG00000264574	miRNA	miRBase:MI0016747
MI0006388	8.94E-04	4.71E-04	down	56747737	-56747737	-25045629	hsa-mir-1254-1	100302273		miRNA	miRBase:MI0006388
MI0003129	4.84E-04	2.16E-04	up	22159107	22159107	11478997	hsa-mir-146b	574447	ENSG00000202569	miRNA	miRBase:MI0003129
MI0006444	4.04E-05	1.60E-05	down	41809597	-41809597	-20638342	hsa-mir-1307	100302174	ENSG00000221767	miRNA	miRBase:MI0006444
chr11.trna12	6.18E-04	2.93E-04	down	4456842	-4456842	-21560218	trna12			tRNA
ENSG00000202314	3.74E-06	7.23E-07	up	11272555	11272555	34947426	SNORD6	692075	ENSG00000202314	snoRNA	RFAM:RF00342
MI0000061	3.74E-06	7.39E-07	up	3009537	3009537	15895416	hsa-let-7a-2	406882	ENSG00000198975	miRNA	miRBase:MI0000061|RFAM:RF00027
MI0000102	0.00302709	0.001752526	down	17640453	-17640453	-41408157	hsa-mir-100	406892	ENSG00000207994	miRNA	miRBase:MI0000102|RFAM:RF00104
MI0000071	1.85E-05	6.46E-06	down	2763892	-2763892	-14667011	hsa-mir-17	406952	ENSG00000215417	miRNA	miRBase:MI0000071|RFAM:RF00051
MI0000072	1.32E-05	3.30E-06	down	18123438	-18123438	-4179785	hsa-mir-18a	406953		miRNA	miRBase:MI0000072
chr14.trna13	1.85E-05	6.52E-06	up	63978443	63978443	26775858	trna13			tRNA
MI0000825	6.25E-06	1.36E-06	down	7121257	-7121257	-28321319	hsa-mir-345	442910	ENSG00000198984	miRNA	miRBase:MI0000825
ENSG00000199214	1.33E-05	3.74E-06	up	1472754	1472754	38804445	Y_RNA		ENSG00000199214	scRNA	RFAM:RF00019
chr15.trna11	6.43E-04	3.21E-04	up	5157104	5157104	23665612	trna11			tRNA
chr15.trna2	1.88E-05	6.93E-06	up	64360204	64360204	2686169	trna2			tRNA
MI0014210	1.69E-04	7.10E-05	down	16167458	-16167458	-4015021	hsa-mir-3176	100423037		miRNA	miRBase:MI0014210
chr16.trna10	1.62E-05	4.91E-06	up	9217645	9217645	32043982	trna10			tRNA
chr16.trna27	0.001550197	8.77E-04	up	2975269	2975269	15730201	trna27			tRNA
ENSG00000199949	9.51E-05	3.88E-05	down	63355193	-63355193	-26634629	Y_RNA		ENSG00000199949	scRNA	RFAM:RF00019
chr17.trna7	1.32E-05	3.47E-06	down	7070066	-7070066	-28217237	trna7			tRNA
MI0000460	2.03E-08	1.25E-09	down	71237537	-71237537	-9476494	hsa-mir-144	406936	ENSG00000264066	miRNA	miRBase:MI0000460
MI0000745	0.001161827	6.42E-04	down	32142472	-32142472	-16844809	hsa-mir-301a	407027		miRNA	miRBase:MI0000745
MI0000077	6.42E-07	8.45E-08	up	52065887	52065887	23803384	hsa-mir-21	406991	ENSG00000199004	miRNA	miRBase:MI0000077
MI0000079	2.03E-08	1.34E-09	up	40891735	40891735	53537374	hsa-mir-23a	407010	ENSG00000207980	miRNA	miRBase:MI0000079
MI0000746	0.019922307	0.013893188	up	3193406	3193406	1675096	hsa-mir-99b	407056	ENSG00000207550	miRNA	miRBase:MI0000746
ENSG00000251806	3.28E-08	3.02E-09	up	3666118	3666118	51961813	SNORD119	100113378	ENSG00000251806	snoRNA	RFAM:RF00570
ENSG00000221116	1.87E-04	8.10E-05	up	42721925	42721925	20949767	SNORD110	692213	ENSG00000221116	snoRNA	RFAM:RF00610
ENSG00000212232	2.28E-07	2.70E-08	up	19902727	19902727	4314894	SNORD17	692086	ENSG00000212232	snoRNA	RFAM:RF00567
chr21.trna2	0.003354461	0.001986194	up	3405706	3405706	17679539	trna2			tRNA
MI0000681	2.19E-08	1.73E-09	up	13479913	13479913	70746675	hsa-mir-155	406947	ENSG00000234883	miRNA	miRBase:MI0000681
MI0020364	6.86E-06	1.62E-06	up	5108046	5108046	23527715	hsa-mir-6087			miRNA	miRBase:MI0020364
MI0001519	6.25E-06	1.40E-06	down	10969792	-10969792	-34554644	hsa-mir-20b	574032	ENSG00000207710	miRNA	miRBase:MI0001519
